# Supplementary material for: Novel Circular Single-Stranded DNA Viruses among an Asteroid, Echinoid and Holothurian (Phylum: Echinodermata)
Source: PubMed Central journal article supplement (PMC5113903; doi:10.1371/journal.pone.0166093), 2016-11-17

**S10 Fig. Hydrophobic plot of hypothetical capsid protein of PcaCV4.**

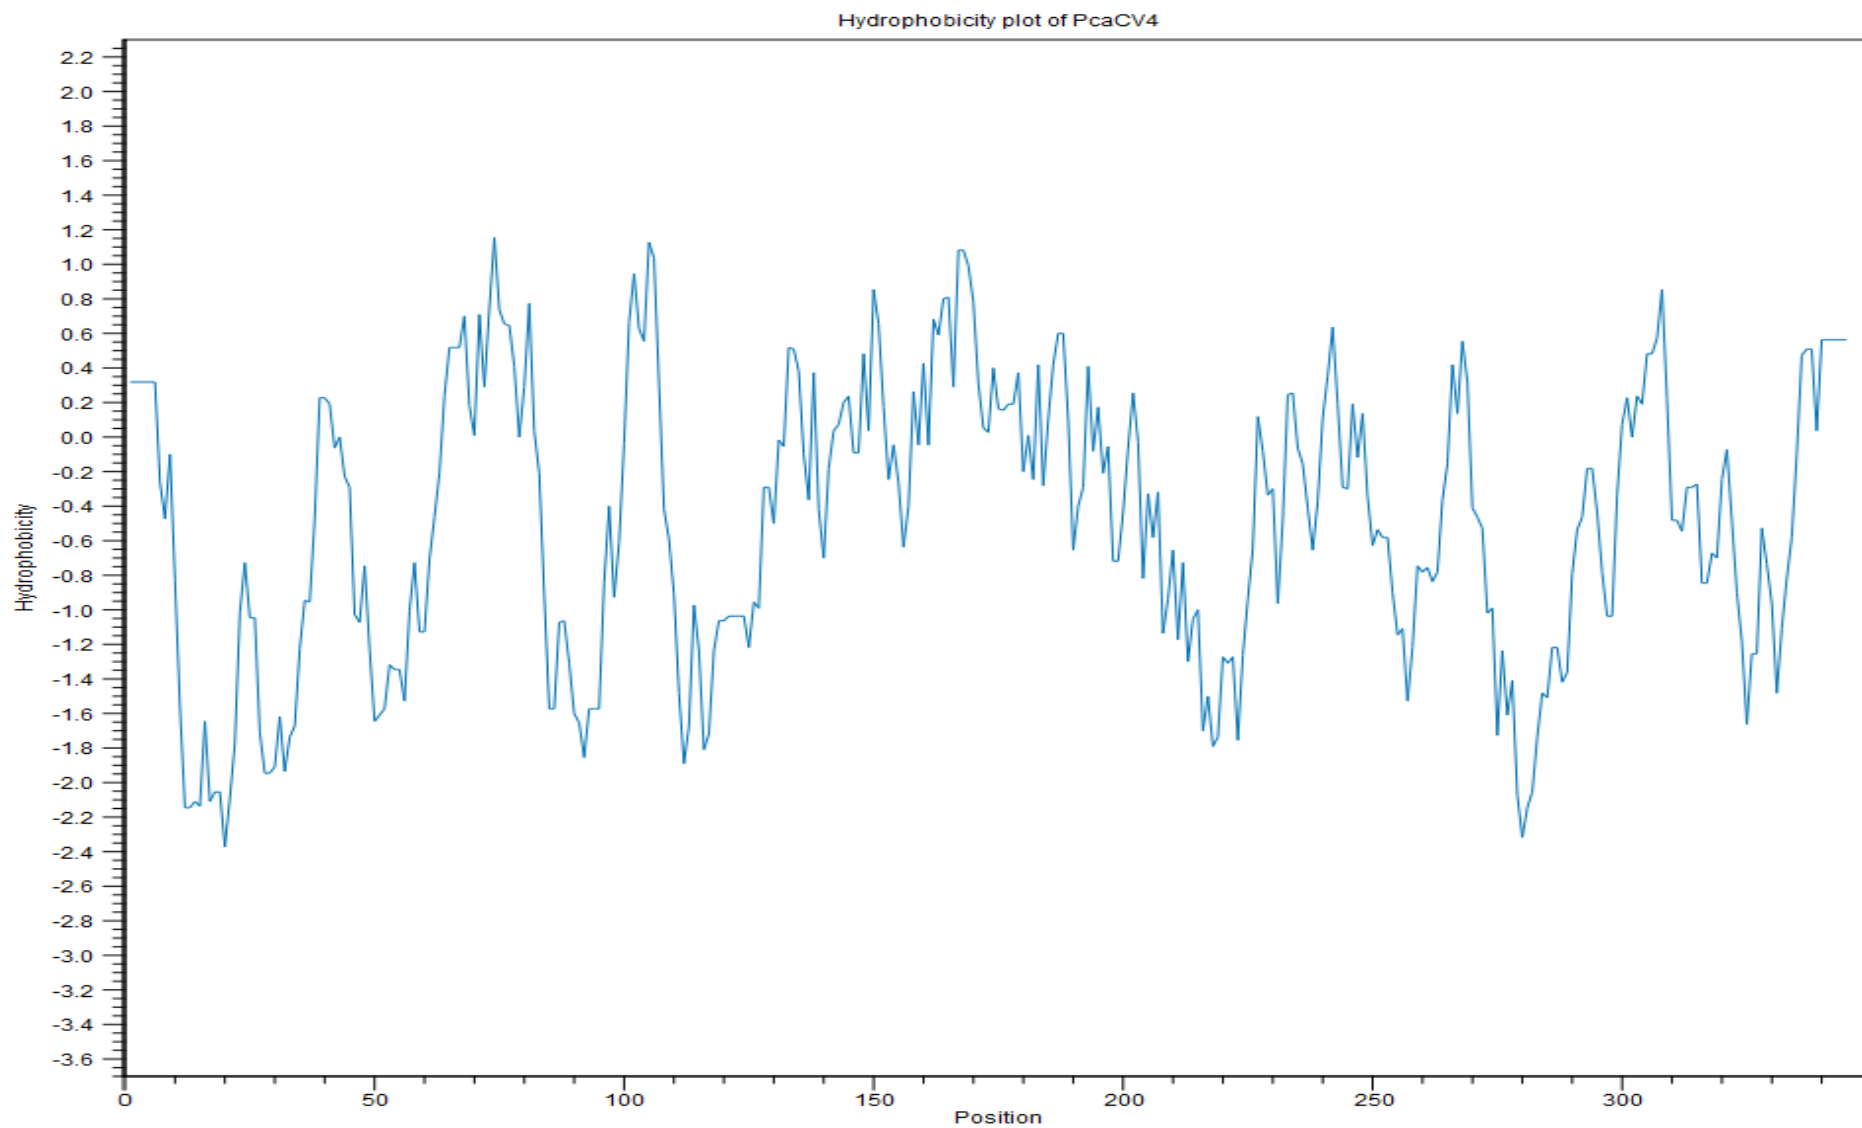

Supplement: pone.0166093.s010.pdf [file pone.0166093.s010.pdf]
