# Supplementary material for: Novel Circular Single-Stranded DNA Viruses among an Asteroid, Echinoid and Holothurian (Phylum: Echinodermata)
Source: PubMed Central journal article supplement (PMC5113903; doi:10.1371/journal.pone.0166093), 2016-11-17
Supplement: pone.0166093.s011.pdf [file pone.0166093.s011.pdf]

**S1 Table. RCR and SF3 Helicase motifs found in circular ssDNA viruses. Conserved amino acid motifs obtained from alignments of putative *Rep* gene using MUCLE.**

|             | RCR Motifs        |                 |          | SF3 Helicase Motifs |                       |             |
|-------------|-------------------|-----------------|----------|---------------------|-----------------------|-------------|
|             | I                 | II              | III      | Walker A            | Walker B              | Walker C    |
| Circovirus  | [CV]FT[LI]NN      | PHLQG           | YC[Sx]K  | GP[Ps][Gc]xGKS      | [VI][IML]DDF          | UTSN        |
| Cyclovirus  | [CV]FT[WL]NN      | [Px]HLQG        | YC[Sx]K  | G[Px][Pt]GxGKS      | [IV][IU]DDF           | UTS[Ne]     |
| Geminivirus | FLTY[Ps]x         | [Px]H[Lx]H[VAC] | Y[UAC]xK | Gx[ST]R[TI]GK[TS]   | [VI][IV]DD[VI]        | UL[Cx]N     |
| Nanovirus   | [VCx]FT[LI]N[FYN] | xHUQG           | Y[CAS]xK | G[PS]xG[GN]EGK[TS]  | [VIW][UAC][FIM]D[IVF] | V[FMI][AC]N |
| AfaCV2      | MFTLFV            | LHVQG           | YCSK     | GDPGSGKT            | IFDDF                 | ITSN        |
| AfaCV3      | CFTDFK            | KHNQG           | YCSK     | GKAGTGKT            | LIDDF                 | ITSN        |
| AfaCV4      | CFTLNN            | KHLQG           | YACK     | GPTGSGKT            | LMDDF                 | ITSN        |
| AfaCV5      | VFTNYD            | PHHQG           | YCSK     | GPSGAGKS            | ILNEF                 | ITSV        |
| SdaCV1      | CFTLNN            | PHLQG           | YCSK     | -----               | ----                  | ----        |
| SdaCV2      | CWTLNN            | PHLQG           | YCKK     | GPTGTGKT            | LFDDF                 | ITSN        |
| PcaCV1      | VFTLNN            | PHYQG           | YCEK     | GDTGVGKS            | IINDF                 | ITSS        |
| PcaCV2      | VYTWNN            | EHFQG           | YSSK     | GEPGTGKT            | LLDDF                 | ITTN        |
| PcaCV3      | CFTWFA            | PHVQG           | ----     | GPTGVGKT            | ILDDF                 | ITSN        |
| PcaCV4      | CLTINN            | KHLQV           | YCSK     | GVTGSGKT            | IIDDM                 | ITTT        |

U = I, L, V, M, F, Y, W
