# Supplementary material for: Novel Circular Single-Stranded DNA Viruses among an Asteroid, Echinoid and Holothurian (Phylum: Echinodermata)
Source: PubMed Central journal article supplement (PMC5113903; doi:10.1371/journal.pone.0166093), 2016-11-17
Supplement: pone.0166093.s012.pdf [file pone.0166093.s012.pdf]

**S2 Table. Rep sequences pulled from NCBI for SDT analysis.**

|              |                                                                                                                          |
|--------------|--------------------------------------------------------------------------------------------------------------------------|
| GoCV         | gi 76009487 gb ABA39137.1  Rep [Goose circovirus]                                                                        |
| RW-A         | gi 254688518 ref YP_003084282.1  putative Rep protein [Circovirus-like genome RW-A]                                      |
| RW-C         | gi 254688525 ref YP_003084287.1  putative Rep protein [Circovirus-like genome RW-C]                                      |
| BatCV09      | gi 342356290 gb AEL28803.1  replication-associated protein, partial [Bat circovirus ZS/Yunnan-China/2009]                |
| SOG00160     | gi 429890862 gb AGA18245.1  hypothetical protein [uncultured marine virus]                                               |
| SOG03994     | gi 429890944 gb AGA18263.1  hypothetical protein [uncultured marine virus]                                               |
| GOM00583     | gi 429891106 gb AGA18314.1  hypothetical protein [uncultured marine virus]                                               |
| GOM02856     | gi 429891193 gb AGA18339.1  hypothetical protein [uncultured marine virus]                                               |
| MarineCRESS1 | gi 429891313 gb AGA18377.1  hypothetical protein [uncultured marine virus]                                               |
| SI00142      | gi 429891345 gb AGA18387.1  hypothetical protein [uncultured marine virus]                                               |
| MarineCRESS2 | gi 429891360 gb AGA18391.1  hypothetical protein [uncultured marine virus]                                               |
| SI00850      | gi 429891424 gb AGA18409.1  hypothetical protein [uncultured marine virus]                                               |
| SI03654      | gi 429891524 gb AGA18434.1  hypothetical protein [uncultured marine virus]                                               |
| MarineCRESS3 | gi 444298002 dbj GAC77838.1  replication protein [uncultured marine virus]                                               |
| MarineCRESS4 | gi 444298006 dbj GAC77836.1  replication protein, partial [uncultured marine virus]                                      |
| MarineCRESS5 | gi 444298044 dbj GAC77817.1  replication protein, partial [uncultured marine virus]                                      |
| MarineCRESS6 | gi 444298094 dbj GAC77792.1  replication protein, partial [uncultured marine virus]                                      |
| MarineCRESS7 | gi 444298146 dbj GAC77766.1  replication protein, partial [uncultured marine virus]                                      |
| LM28925      | gi 459116743 gb AGG39829.1  replication-associated protein [Diporeia sp. associated circular virus]                      |
| PGV          | gi 508182168 ref YP_008052687.1  Rep domain protein [Phaeocystis globosa virus]                                          |
| FdaCV        | gi 528890055 gb AGS47835.1  replication-associated protein [Farfantepenaeus duorarum circovirus]                         |
| SaCV-12      | gi 664651384 gb AIF34802.1  replication-associated protein [Sewage-associated circular DNA virus-12]                     |
| BatCV        | gi 665518995 gb AIF76250.1  Rep [Bat circovirus]                                                                         |
| LDMD15       | gi 725829244 ref YP_009109675.1  replication-associated protein [Circoviridae 15 LDMD-2013]                              |
| LDMD21       | gi 725829260 ref YP_009109686.1  replication-associated protein [Circoviridae 21 LDMD-2013]                              |
| AHEaCV2      | gi 761263102 gb AJP36339.1  replication-associated protein, partial [Avon-Heathcote Estuary associated circular virus 2] |

|          |                                                                                                                            |
|----------|----------------------------------------------------------------------------------------------------------------------------|
| AHEaCV6  | gi 761263147 gb AJP36362.1  replication-associated protein [Avon-Heathcote Estuary associated circular virus 6]            |
| AHEaCV5  | gi 765702617 ref YP_009126884.1  replication-associated protein [Avon-Heathcote Estuary associated circular virus 5]       |
| AHEaCV9  | gi 765702634 ref YP_009126896.1  replication-associated protein [Avon-Heathcote Estuary associated circular virus 9]       |
| AHEaCV19 | gi 765702674 ref YP_009126925.1  replication-associated protein [Avon-Heathcote Estuary associated circular virus 19]      |
| EquCy    | gi 850199434 gb AKN50607.1  Rep protein [Cyclovirus Equ1]                                                                  |
| FCCV     | gi 922073305 ref YP_009163918.1  putative replication initiation protein [Fiddler Crab associated circular virus]          |
| CalCV    | gi 922073318 ref YP_009163927.1  putative replication initiation protein [Calanoida sp. copepod associated circular virus] |
| DLaCV6   | gi 927769377 gb ALE29847.1  replication associated protein, partial [Dragonfly larvae associated circular virus-6]         |
