# Supplementary material for: Novel Circular Single-Stranded DNA Viruses among an Asteroid, Echinoid and Holothurian (Phylum: Echinodermata)
Source: PubMed Central journal article supplement (PMC5113903; doi:10.1371/journal.pone.0166093), 2016-11-17
Supplement: pone.0166093.s013.pdf [file pone.0166093.s013.pdf]

**S3 Table. GenBank accession #s for novel virus genomes recovered in this study.**

EchinoCRESS.sqn AfaCV3 KX246255  
EchinoCRESS.sqn AfaCV4 KX246256  
EchinoCRESS.sqn AfaCV2 KX246257  
EchinoCRESS.sqn AfaCV5 KX246258  
EchinoCRESS.sqn SdaCV2 KX246259  
EchinoCRESS.sqn SdaCV1 KX246260  
EchinoCRESS.sqn PcaCV1 KX246261  
EchinoCRESS.sqn PcaCV4 KX246262  
EchinoCRESS.sqn PcaCV3 KX246263  
EchinoCRESS.sqn PcaCV2 KX246264
