# Supplementary material for: Novel Circular Single-Stranded DNA Viruses among an Asteroid, Echinoid and Holothurian (Phylum: Echinodermata)
Source: PLOS journal article supplement (doi:10.1371/journal.pone.0166093), 2016-11-17

**S2 Fig. Hydrophobic plot of hypothetical capsid protein of AfaCV3.**

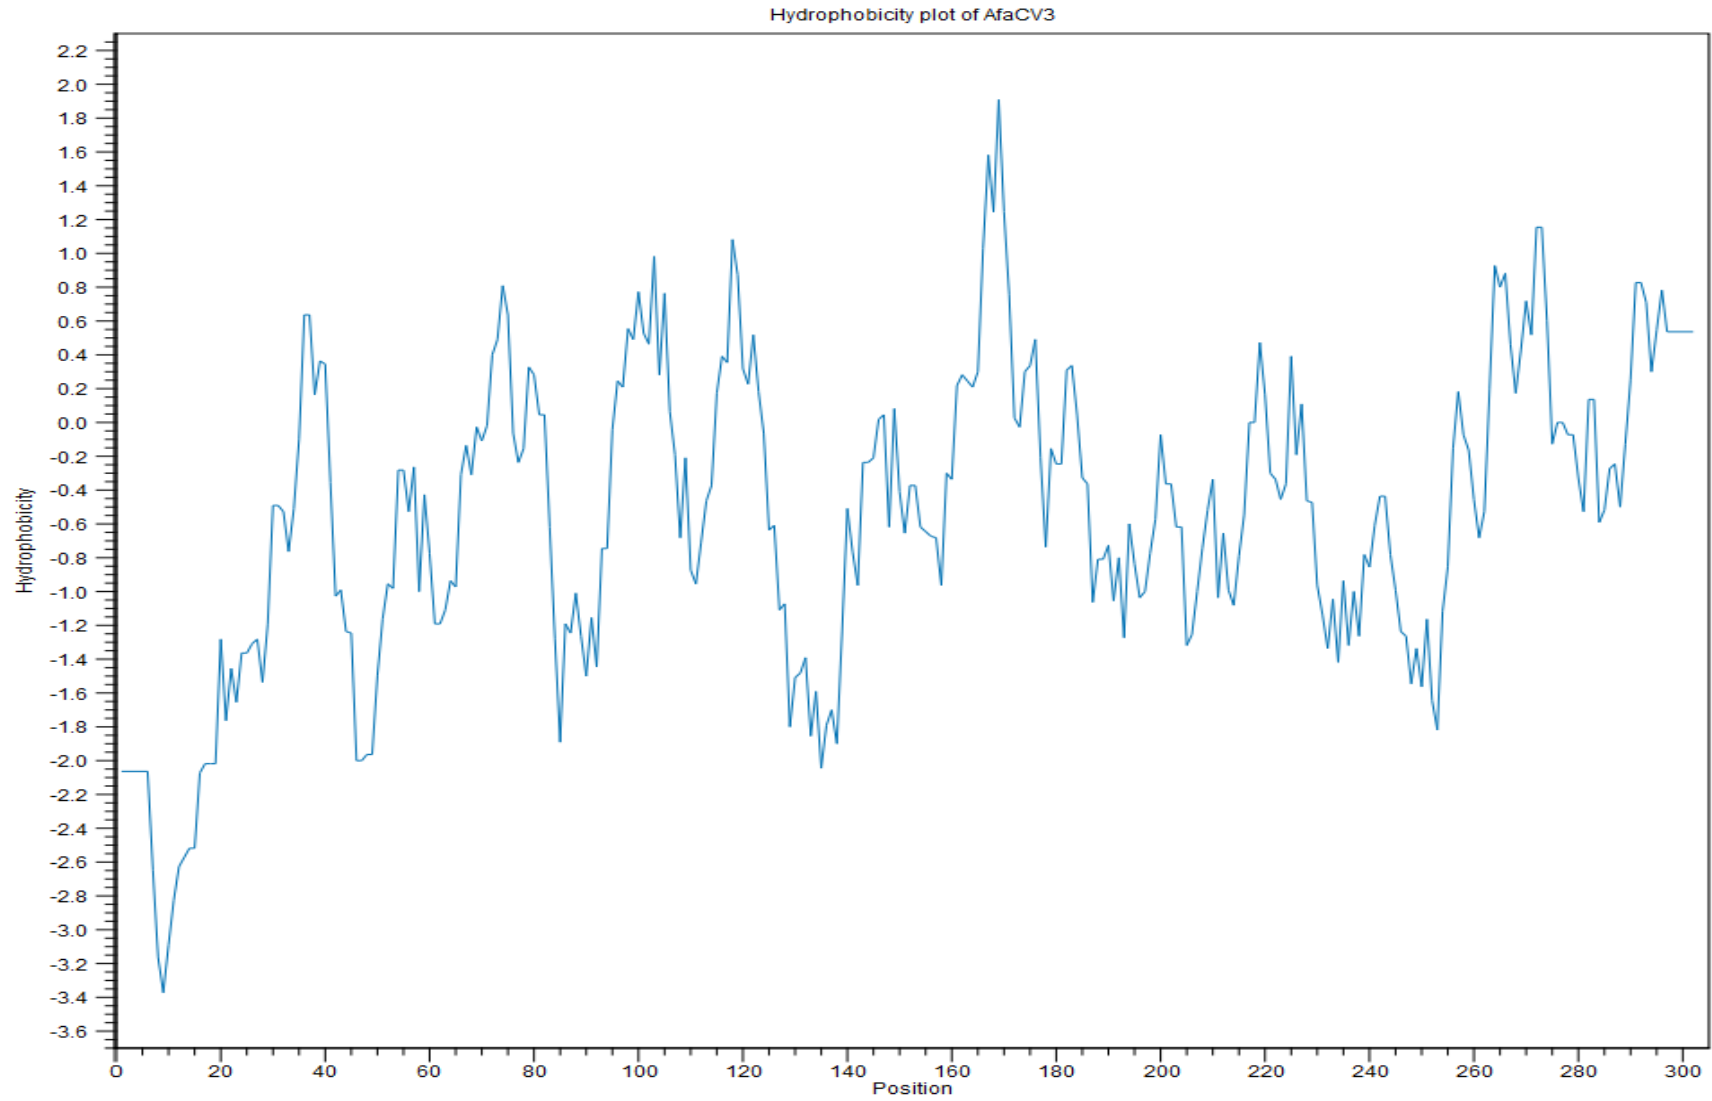

Supplement: S2 (10.1371/journal.pone.0166093.s002) [file journal.pone.0166093.s002]
